# Supplementary material for: The effects of lignin source and extraction on the composition and properties of biorefined depolymerization products
Source: Royal Society of Chemistry journal article supplement (doi:10.1039/d3su00262d), 2023-01-01
Supplement: d3su00262d1.pdf [file d3su00262d1.pdf]

# The effects of lignin source and extraction on the composition and properties of biorefined depolymerization products

*Natalia Obrzut<sup>a</sup>, Rob Hickmott<sup>a</sup>, Lily Shure<sup>a</sup>, and Kimberly A. Gray<sup>a†</sup>*

<sup>a</sup>Department of Civil and Environmental Engineering, Northwestern University, 2145 Sheridan  
Road, Evanston, Illinois 60208, United States

† Corresponding author: [k-gray@northwestern.edu](mailto:k-gray@northwestern.edu)

Number of Pages: 20

Number of Supplementary Figures: 12

Number of Supplementary Tables: 6

Figure 1. Calibration curves for the Milled Wood, Organosolv, and Klason extraction of herbaceous (corn stover) lignin and the Klason extractions of softwood (white spruce) and hardwood (bitternut hickory) lignin. The MWL and Organosolv calibrations were made with a 20x dilution, the herbaceous Klason was made with a 10x dilution, and the softwood and hardwood were made with a 2x dilution. The softwood and hardwood did not have full dissolution with pH 14 NaOH so the remaining solids were dried and weighed to determine the actual concentration in solution.....3

Figure 2. a) The calibration curve for the Folin-Ciocalteu method, made with gallic acid (3, 4,5-trihydroxybenzoic acid) at 750 nm. b) The calibration curve for the Zhishen method, made with rutin (3',4',5,7-Tetrahydroxy-3-[ $\alpha$ -L-rhamnopyranosyl-(1 $\rightarrow$ 6)- $\beta$ -D-glucopyranosyloxy]flavone) at 510 nm.....3

Figure 3. The inhibition of absorbance produced by the phosphate buffer at pH 10.8. Under 20 mg/L of buffer, the inhibition is negligible (SD < 0.01). Between 20-200 mg/L the inhibition increases linearly. Above 200 mg/L the inhibition is constant (SD < 0.01). The correction factors are listed in Table S1.....4

Figure 4. NMR spectra for aromatic and aliphatic regions for all lignin extractions. ....5

Figure 5. ABTS scavenging for herbaceous Organosolv (HO) and the Klason extractions of herbaceous (HK), softwood (SK), and hardwood (HaK )lignin in water. We see no antioxidant activity. ....7

Figure 6. The zeta potential in mV for HK, SK, and HaK in basic and neutral conditions. Zeta potential indicates moderate stability in basic conditions. ....8

Figure 7. The PDI for HK, SK, and HaK in basic and neutral conditions. PDI of <0.05 indicates a monodisperse sample. PDI > 0.7 indicates highly polydisperse sample.....8

Figure 8. The zeta potential in mV for HO and HK in basic and neutral conditions. Zeta potential indicates moderate stability in basic conditions. A reading could not be done for MWL. ....9

Figure 9. The PDI for HO and HK in basic and neutral conditions. PDI of <0.05 indicates a monodisperse sample. PDI > 0.7 indicates highly polydisperse sample. A reading could not be done for MWL.....9

Figure 10. The distribution of compounds from solubilized MWL. The orange indicate compounds that are aromatic. ....10

Figure 11. The Spearman correlation between various parameters. The higher the value (and darker the shade), the stronger the correlation. Red indicates a positive relationship and blue indicates a negative relationship. Note that IC50 is inverse to antioxidant capacity. Therefore a blue value with IC50 indicates a positive correlation with antioxidant capacity.....11

Figure 12. PCA of all depolymerization experiment of HO, HK, SK, and HaK in neutral and basic conditions. The arrows represent various product characteristics and the dots represent individual experiments. ....12

|                                                                                                                                                                                                                                                                                                                                                                                                                                                                                                                                                        |    |
|--------------------------------------------------------------------------------------------------------------------------------------------------------------------------------------------------------------------------------------------------------------------------------------------------------------------------------------------------------------------------------------------------------------------------------------------------------------------------------------------------------------------------------------------------------|----|
| Table 1. Solubilization (sol), LNP conc. (concentration), size, PDI, PC (phenolic content), FC (flavonoid content), zeta (potential), and IC50 data along with its associated error for Klason extractions of herbaceous (HK), softwood (SK), and hardwood (HaK) lignin at basic (B) and neutral (N) conditions for a 14 day time average, the time at which max solubilization occurs, and the time at which minimum IC50 occurs. In the case of the Klason extractions, maximum solubilization and minimum IC50 occur at the same time – day 14..... | 13 |
| Table 2. Solubilization (sol), LNP conc. (concentration), size, PDI, PC (phenolic content), FC (flavonoid content), zeta (potential), and IC50 data along with its associated error for Milled wood lignin (MWL), Organosolv (HO) and Klason(HK) extractions of herbaceous lignin at basic (B) and neutral (N) conditions for a 14 day time average, the time at which max solubilization occurs, and the time at which minimum IC50 occurs.....                                                                                                       | 14 |
| Table 3. The correction factors needed for ABTS scavenging calculations at basic pH. These values were used by subtracting the absorbance from Figure S3 from the initial absorbance of the ABTS without any buffer. ....                                                                                                                                                                                                                                                                                                                              | 15 |
| Table 4. FTIR assignments. The values in bold correspond to those that are highlighted in red in Figure 2 in the manuscript.....                                                                                                                                                                                                                                                                                                                                                                                                                       | 16 |
| Table 5. The R <sup>2</sup> values between various parameters and products in basic conditions. The higher the value and the darker the shade indicate stronger relationships.....                                                                                                                                                                                                                                                                                                                                                                     | 18 |
| Table 6 The R <sup>2</sup> values between various parameters and products in neutral conditions. The higher the value and the darker the shade indicate stronger relationships. ....                                                                                                                                                                                                                                                                                                                                                                   | 19 |

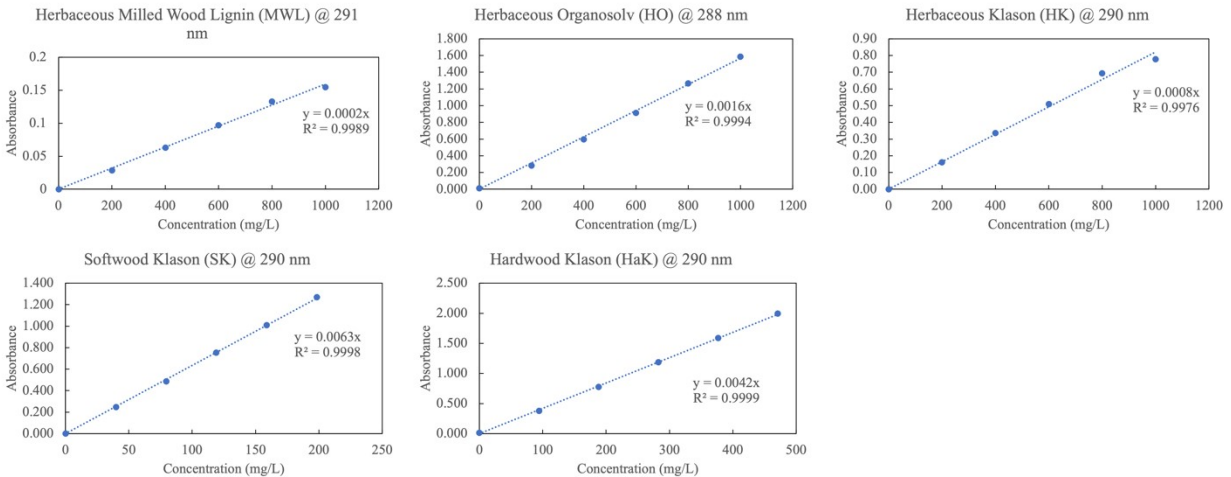

Figure 1. Calibration curves for the Milled Wood, Organosolv, and Klason extraction of herbaceous (corn stover) lignin and the Klason extractions of softwood (white spruce) and hardwood (bitternut hickory) lignin. The MWL and Organosolv calibrations were made with a 20x dilution, the herbaceous Klason was made with a 10x dilution, and the softwood and hardwood were made with a 2x dilution. The softwood and hardwood did not have full dissolution with pH 14 NaOH so the remaining solids were dried and weighed to determine the actual concentration in solution.

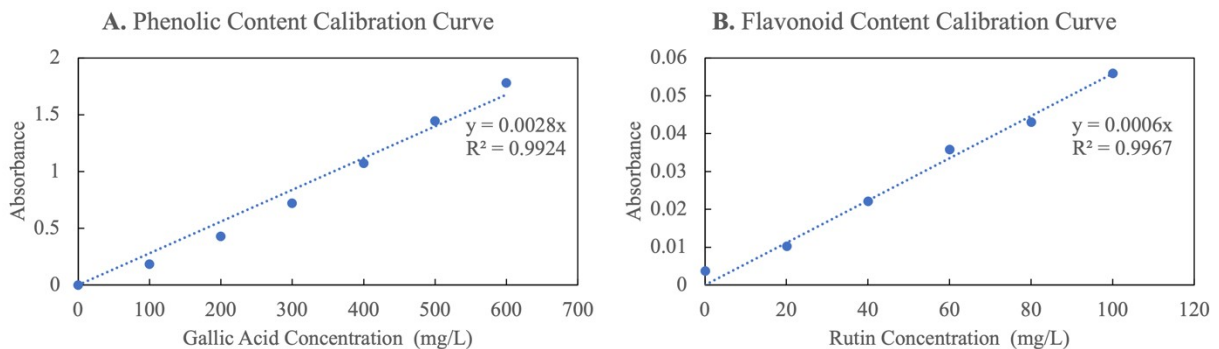

Figure 2. a) The calibration curve for the Folin-Ciocalteu method, made with gallic acid (3, 4,5-trihydroxybenzoic acid) at 750 nm. b) The calibration curve for the Zhishen method, made with rutin (3',4',5,7-Tetrahydroxy-3-[ $\alpha$ -L-rhamnopyranosyl-(1 $\rightarrow$ 6)- $\beta$ -D-glucopyranosyloxy]flavone) at 510 nm.

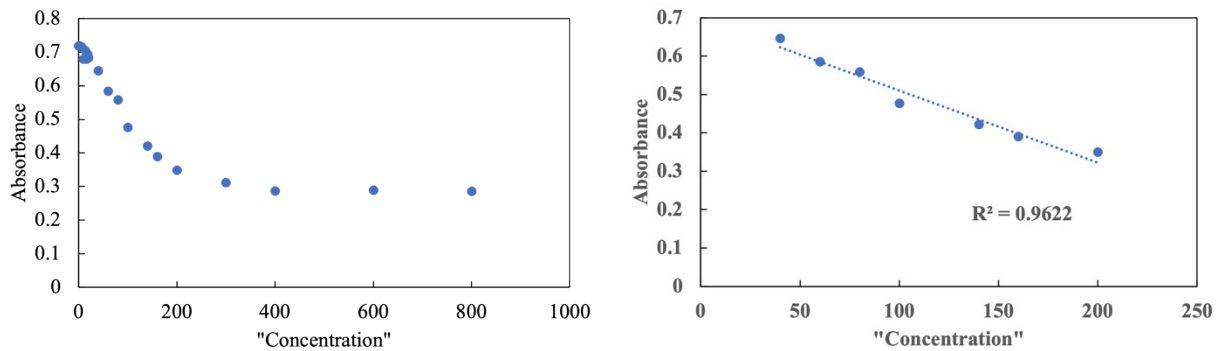

Figure 3. The inhibition of absorbance produced by the phosphate buffer at pH 10.8. Under 20 mg/L of buffer, the inhibition is negligible ( $SD < 0.01$ ). Between 20-200 mg/L the inhibition increases linearly. Above 200 mg/L the inhibition is constant ( $SD < 0.01$ ). The correction factors are listed in Table S1.

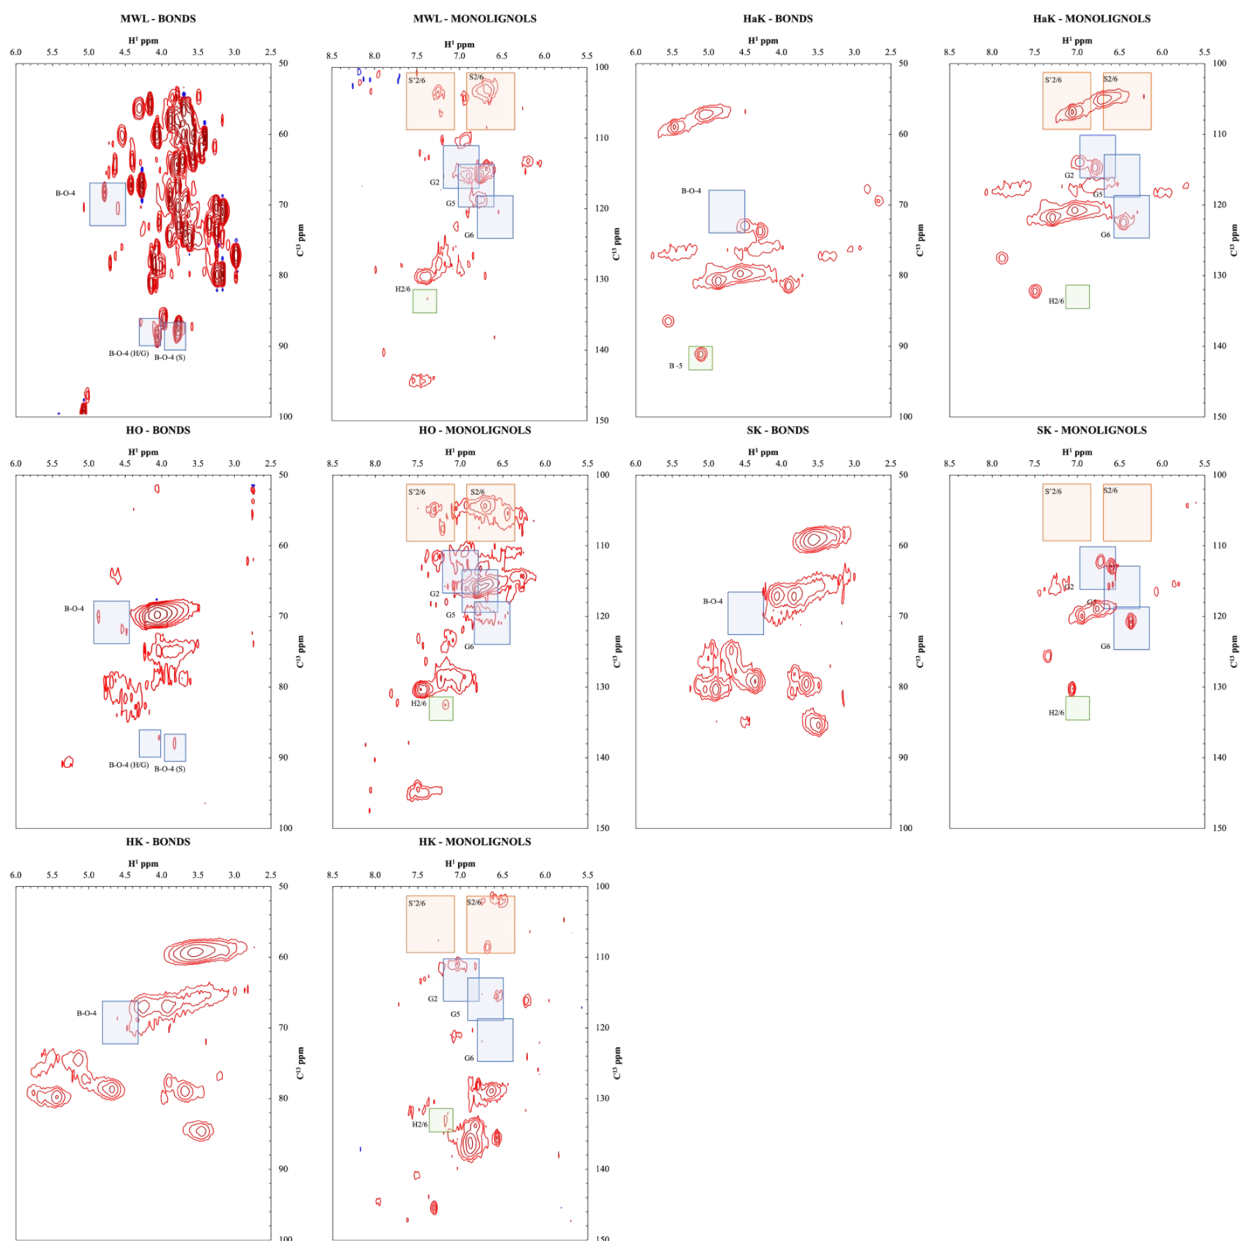

Figure 4. NMR spectra for aromatic and aliphatic regions for all lignin extractions.

$\beta$ -O-4 percentage and S/G ratio was calculated based on the regions and equations reported by Zijlstra et al [1] and Mansfield et al [2].

The following regions were used for the determination of the aromatic ratios:

S2/6: [(6.48-6.90)(104-109)]

S'2/6: [(7.17-7.50)(105-109)]

G2: [(6.78-7.14)(111.5-116)]

G5: [(6.48-7.06)(115-120.5)]

G6: [(6.65-6.96)(120.5-124.5)]

H2/6: [(7.05-7.29)(128.5-133)]

The H/G/S ratios were calculated with the following equations:

Equation S1: Total aromatic =  $\left(\frac{(S2/6 + S'2/6)}{2}\right) + \left(\frac{(G2 + G5 + G6 - H2/6)}{3}\right) + (H2/6 / 2)$

Equation S2: Ratio S =  $\left(\frac{(S2/6 + S'2/6)}{2}\right) : \text{total aromatic} \times 100\%$

Equation S3: Ratio G =  $\left(\frac{(G2 + G5 + G6 - H2/6)}{3}\right) : \text{total aromatic} \times 100\%$

Equation S4: Ratio H =  $(H2/6 / 2) : \text{total aromatic} \times 100\%$

The following regions were used for the determination of the linking motifs:

$\beta$ -O-4 $\alpha$  [(4.76-5.10)(73-77.5)]

$\beta'$ -O-4 $\alpha$  [(4.44-4.84)(81.5-86)]

The number of linking motifs were calculated with the following equations:

Equation S5: #  $\beta$ -O-4 linkages =  $(\beta\text{-O-4}\alpha + \beta'\text{-O-4}\alpha) / \text{total aromatic} \times 100$

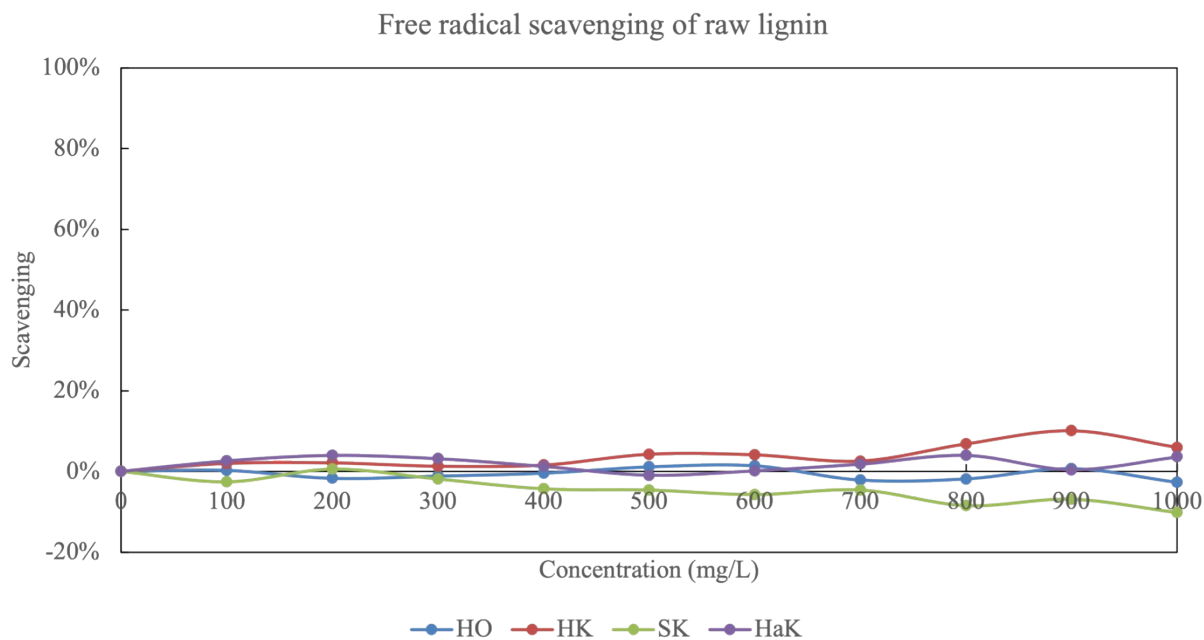

Figure 5. ABTS scavenging for herbaceous Organosolv (HO) and the Klason extractions of herbaceous (HK), softwood (SK), and hardwood (HaK) lignin in water. We see no antioxidant activity.



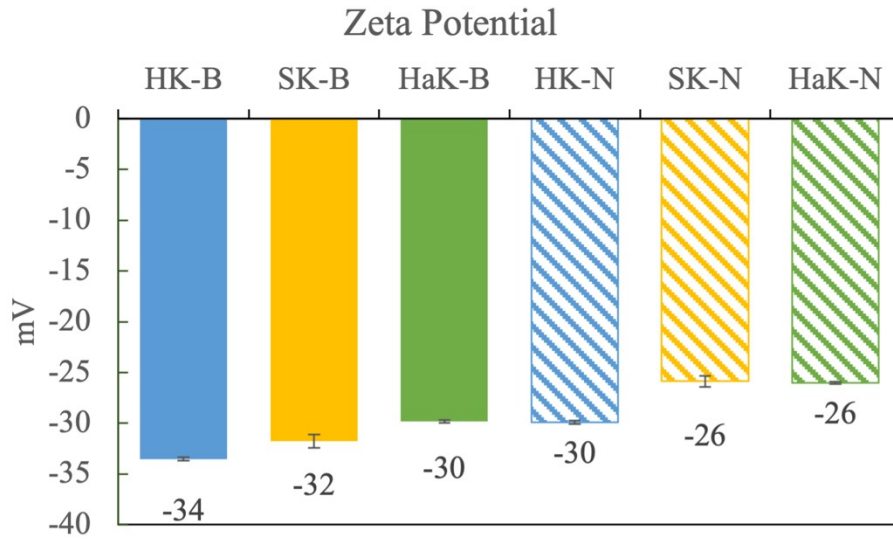

Figure 6. The zeta potential in mV for HK, SK, and HaK in basic and neutral conditions. Zeta potential indicates moderate stability in basic conditions.

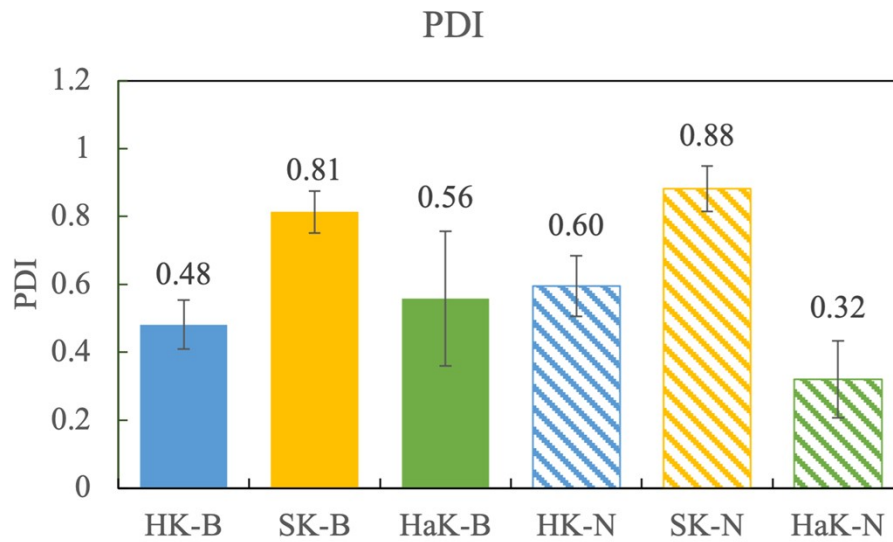

Figure 7. The PDI for HK, SK, and HaK in basic and neutral conditions. PDI of  $<0.05$  indicates a monodisperse sample. PDI  $> 0.7$  indicates highly polydisperse sample.

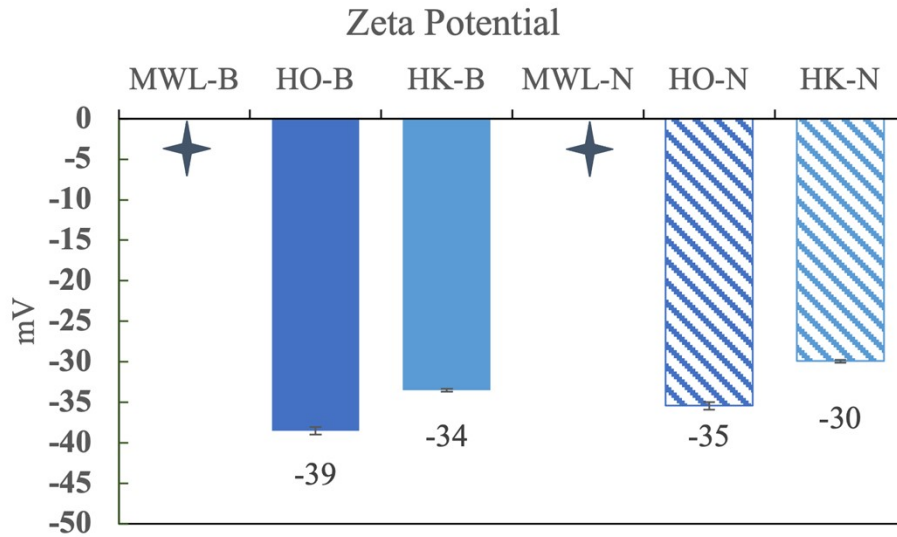

Figure 8. The zeta potential in mV for HO and HK in basic and neutral conditions. Zeta potential indicates moderate stability in basic conditions. A reading could not be done for MWL.

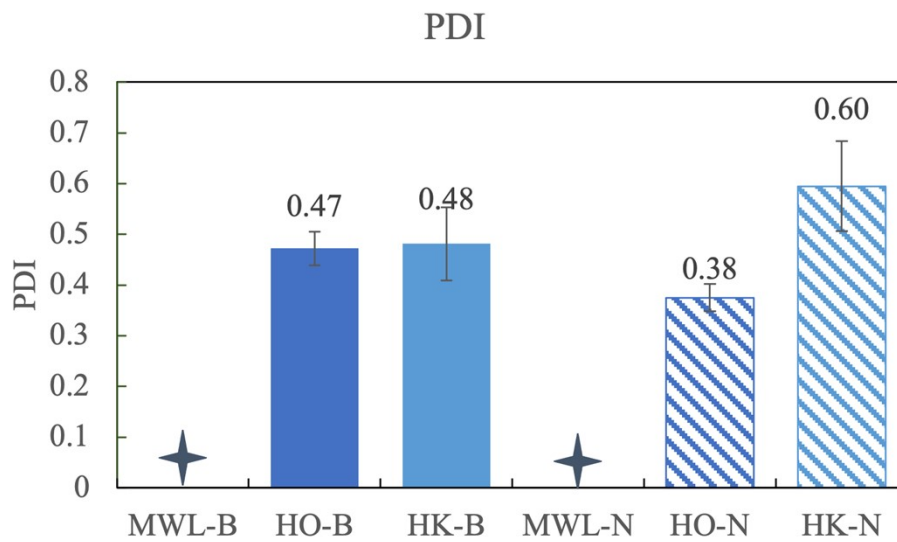

Figure 9. The PDI for HO and HK in basic and neutral conditions. PDI of <math>< 0.05</math> indicates a monodisperse sample. PDI > 0.7 indicates highly polydisperse sample. A reading could not be done for MWL.

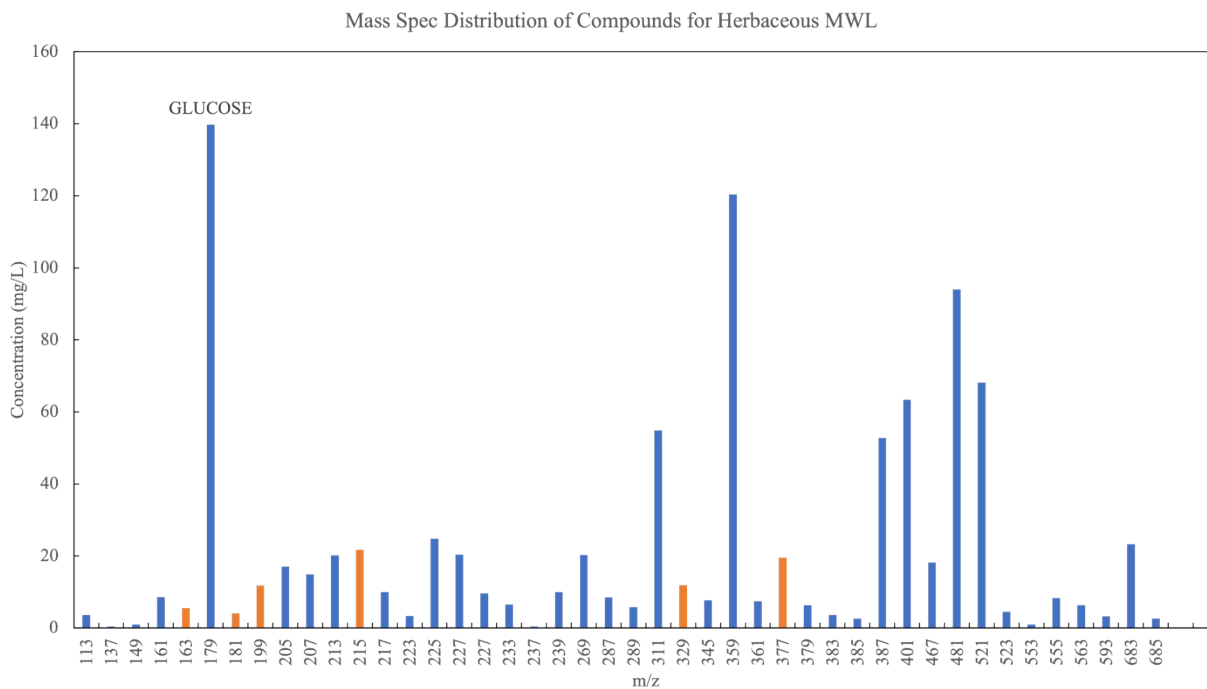

Figure 10. The distribution of compounds from solubilized MWL. The orange indicate compounds that are aromatic.

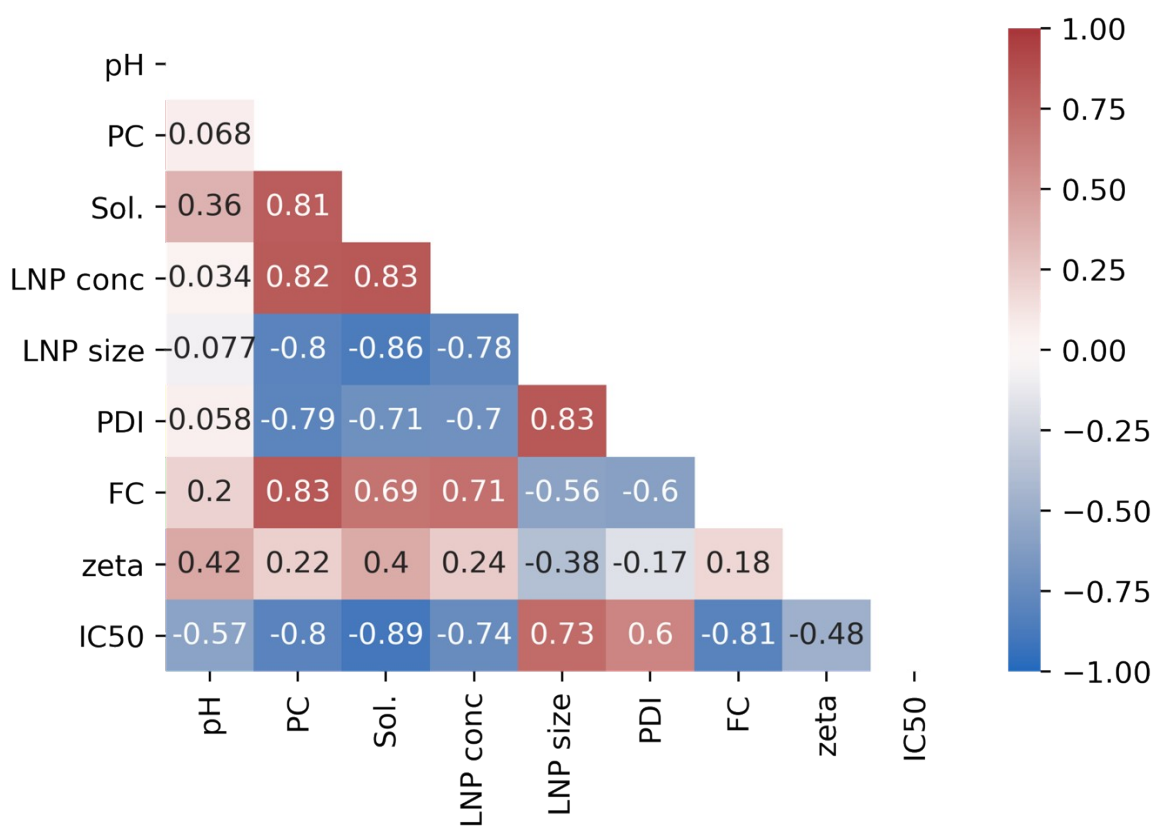

Figure 11. The Spearman correlation between various parameters. The higher the value (and darker the shade), the stronger the correlation. Red indicates a positive relationship and blue indicates a negative relationship. Note that IC50 is inverse to antioxidant capacity. Therefore a blue value with IC50 indicates a positive correlation with antioxidant capacity.

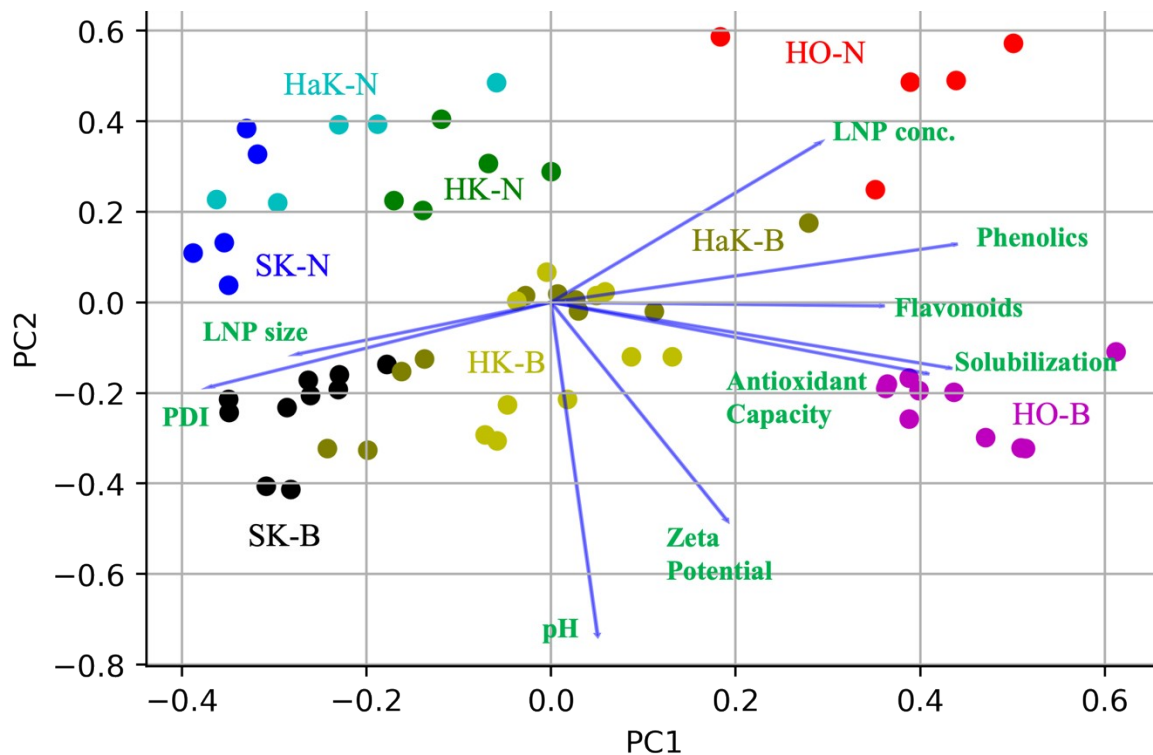

Figure 12. PCA of all depolymerization experiment of HO, HK, SK, and HaK in neutral and basic conditions. The arrows represent various product characteristics and the dots represent individual experiments.

*Table 1. Alternative calculations for product properties. Solubilization (sol), LNP conc. (concentration), size, PDI, PC (phenolic content), FC (flavonoid content), zeta (potential), and IC50 data along with its associated error for Klason extractions of herbaceous (HK), softwood (SK), and hardwood (HaK) lignin at basic (B) and neutral (N) conditions for a 14 day time average, the time at which max solubilization occurs, and the time at which minimum IC50 occurs. In the case of the Klason extractions, maximum solubilization and minimum IC50 occur at the same time – day 14.*

|       |             | time (days) | value       |                  |           |      |           |           |            | RSE        |      |           |      |     |     |     |      |      |
|-------|-------------|-------------|-------------|------------------|-----------|------|-----------|-----------|------------|------------|------|-----------|------|-----|-----|-----|------|------|
|       |             |             | Sol. (mg/L) | LNP conc. (mg/L) | Size (nm) | PDI  | PC (mg/L) | FC (mg/L) | Zeta (-mV) | IC50 (g/L) | Sol. | LNP conc. | Size | PDI | PC  | FC  | Zeta | IC50 |
| HK-B  | AVG         | -----       | 503.7       | 144.9            | 1495.3    | 0.68 | 146.0     | 50.6      | 31.0       | 113.9      | 11%  | 18%       | 32%  | 8%  | 9%  | 14% | -4%  | 6%   |
|       | Max depol.  | 14          | 620.9       | 212.9            | 3417.1    | 0.48 | 186.1     | 52.3      | 33.5       | 107.4      | 6%   | 9%        | 36%  | 15% | 6%  | 22% | -1%  | 2%   |
|       | lowest IC50 | 14          | 620.9       | 212.9            | 3417.1    | 0.48 | 186.1     | 52.3      | 33.5       | 107.4      | 6%   | 9%        | 36%  | 15% | 6%  | 22% | -1%  | 2%   |
| SK-B  | AVG         | -----       | 26.1        | 9.1              | 3760.8    | 0.88 | 66.3      | 73.8      | 31.4       | 834.5      | 14%  | 30%       | 18%  | 6%  | 18% | 15% | -2%  | 16%  |
|       | Max depol.  | 14          | 33.4        | 18.6             | 6252.8    | 0.81 | 109.8     | 110.5     | 31.8       | 505.3      | 46%  | 7%        | 24%  | 8%  | 23% | 14% | -2%  | 14%  |
|       | lowest IC50 | 14          | 33.4        | 18.6             | 6252.8    | 0.81 | 109.8     | 110.5     | 31.8       | 505.3      | 46%  | 7%        | 24%  | 8%  | 23% | 14% | -2%  | 14%  |
| HaK-B | AVG         | -----       | 263.0       | 117.3            | 2364.0    | 0.82 | 212.3     | 138.3     | 29.0       | 148.9      | 22%  | 42%       | 12%  | 9%  | 17% | 25% | -4%  | 34%  |
|       | Max depol.  | 14          | 345.1       | 283.9            | 3379.8    | 0.56 | 318.6     | 231.0     | 29.8       | 72.3       | 1%   | 16%       | 15%  | 36% | 2%  | 4%  | 0%   | 2%   |
|       | lowest IC50 | 14          | 345.1       | 283.9            | 3379.8    | 0.56 | 318.6     | 231.0     | 29.8       | 72.3       | 1%   | 16%       | 15%  | 36% | 2%  | 4%  | 0%   | 2%   |
| HK-N  | AVG         | -----       | 260.9       | 106.3            | 1303.7    | 0.76 | 137.8     | 82.1      | 29.0       | 201.1      | 6%   | 29%       | 11%  | 6%  | 10% | 16% | -2%  | 8%   |
|       | Max depol.  | 14          | 295.4       | 109.3            | 751.0     | 0.60 | 155.7     | 107.2     | 29.9       | 167.2      | 6%   | 9%        | 36%  | 15% | 6%  | 22% | -1%  | 2%   |
|       | lowest IC50 | 14          | 295.4       | 109.3            | 751.0     | 0.60 | 155.7     | 107.2     | 29.9       | 167.2      | 6%   | 9%        | 36%  | 15% | 6%  | 22% | -1%  | 2%   |
| SK-B  | AVG         | -----       | 12.0        | 9.4              | 3035.1    | 0.94 | 39.0      | 31.8      | 29.2       | 995.9      | 16%  | 30%       | 5%   | 4%  | 17% | 52% | -5%  | 8%   |
|       | Max depol.  | 14          | 19.3        | 14.0             | 3296.7    | 0.88 | 49.4      | 87.4      | 25.9       | 729.8      | 46%  | 7%        | 24%  | 8%  | 23% | 14% | -2%  | 14%  |
|       | lowest IC50 | 14          | 19.3        | 14.0             | 3296.7    | 0.88 | 49.4      | 87.4      | 25.9       | 729.8      | 46%  | 7%        | 24%  | 8%  | 23% | 14% | -2%  | 14%  |
| HaK-B | AVG         | -----       | 32.9        | 16.9             | 2042.9    | 0.73 | 133.2     | 49.2      | 27.3       | 569.5      | 7%   | 48%       | 11%  | 17% | 17% | 41% | -2%  | 13%  |
|       | Max depol.  | 14          | 36.2        | 46.8             | 2043.3    | 0.32 | 191.0     | 123.1     | 26.0       | 385.6      | 1%   | 16%       | 15%  | 36% | 2%  | 4%  | 0%   | 2%   |
|       | lowest IC50 | 14          | 36.2        | 46.8             | 2043.3    | 0.32 | 191.0     | 123.1     | 26.0       | 385.6      | 1%   | 16%       | 15%  | 36% | 2%  | 4%  | 0%   | 2%   |

Table 2. Alternative calculations for product properties Solubilization (sol), LNP conc. (concentration), size, PDI, PC (phenolic content), FC (flavonoid content), zeta (potential), and IC50 data along with its associated error for Milled wood lignin (MWL), Organosolv (HO) and Klason(HK) extractions of herbaceous lignin at basic (B) and neutral (N) conditions for a 14 day time average, the time at which max solubilization occurs, and the time at which minimum IC50 occurs.

|       |             | Time (days) | Sol. (mg/L) | LNP conc. (mg/L) | Size (nm) | Value |           |           |             |            | RSE  |           |      |     |     |     |      |      |
|-------|-------------|-------------|-------------|------------------|-----------|-------|-----------|-----------|-------------|------------|------|-----------|------|-----|-----|-----|------|------|
|       |             |             |             |                  |           | PDI   | PC (mg/L) | FC (mg/L) | Zeta (- mV) | IC50 (g/L) | Sol. | LNP conc. | Size | PDI | PC  | FC  | Zeta | IC50 |
| MWL-B | AVG         | -----       | 627.5       | 61.5             | 1849.0    | 0.95  | 48.6      | 28.2      | 43.0        | 316.5      | 7%   | 25%       | 4%   | 1%  | 2%  | 47% | 8%   | 27%  |
|       | Max depol.  | 0           | 671.4       | 45.9             | 1771.7    | 0.96  | 47.5      | 15.0      | 46.6        | 230.3      | 4%   | 12%       | 13%  | 4%  | 6%  | 6%  | 2%   | 15%  |
|       | lowest IC50 | 0           | 671.4       | 45.9             | 1771.7    | 0.96  | 47.5      | 15.0      | 46.6        | 230.3      | 4%   | 12%       | 13%  | 4%  | 6%  | 6%  | 2%   | 15%  |
| HO-B  | AVG         | -----       | 826.4       | 209.4            | 474.5     | 0.49  | 349.4     | 191.1     | 34.6        | 33.5       | 4%   | 31%       | 10%  | 5%  | 3%  | 17% | 3%   | 5%   |
|       | Max depol.  | 7           | 935.9       | 465.3            | 446.4     | 0.47  | 373.3     | 295.1     | 38.5        | 34.4       | 10%  | 3%        | 3%   | 7%  | 2%  | 0%  | 1%   | 7%   |
|       | lowest IC50 | 0           | 720.2       | 138.8            | 424.4     | 0.47  | 349.8     | 234.0     | 34.8        | 29.7       | 4%   | 6%        | 3%   | 5%  | 3%  | 4%  | 2%   | 4%   |
| HK-B  | AVG         | -----       | 503.7       | 144.9            | 1495.3    | 0.68  | 146.0     | 50.6      | 31.0        | 113.9      | 11%  | 18%       | 32%  | 8%  | 9%  | 14% | 4%   | 6%   |
|       | Max depol.  | 14          | 620.9       | 212.9            | 3417.1    | 0.48  | 186.1     | 52.3      | 33.5        | 107.4      | 6%   | 9%        | 36%  | 15% | 6%  | 22% | 1%   | 2%   |
|       | lowest IC50 | 14          | 620.9       | 212.9            | 3417.1    | 0.48  | 186.1     | 52.3      | 33.5        | 107.4      | 6%   | 9%        | 36%  | 15% | 6%  | 22% | 1%   | 2%   |
| MWL-N | AVG         | -----       | 335.7       | 86.7             | 7521.8    | 0.78  | 48.3      | 35.3      | 35.4        | 475.8      | 2%   | 84%       | 37%  | 17% | 4%  | 55% | 11%  | 25%  |
|       | Max depol.  | 0           | 342.0       | 13.7             | 10282.3   | 0.92  | 46.6      | 15.9      | 39.4        | 357.1      | 1%   | 50%       | 7%   | 9%  | 0%  | 44% | 3%   | 2%   |
|       | lowest IC50 | 0           | 342.0       | 13.7             | 10282.3   | 0.92  | 46.6      | 15.9      | 39.4        | 357.1      | 1%   | 50%       | 7%   | 9%  | 0%  | 44% | 3%   | 2%   |
| HO-N  | AVG         | -----       | 423.1       | 640.8            | 538.8     | 0.45  | 364.7     | 203.0     | 31.8        | 53.8       | 1%   | 27%       | 14%  | 12% | 5%  | 14% | 6%   | 6%   |
|       | Max depol.  | 7           | 431.7       | 996.5            | 504.7     | 0.38  | 390.8     | 310.0     | 35.5        | 58.1       | 11%  | 8%        | 5%   | 7%  | 2%  | 0%  | 1%   | 7%   |
|       | lowest IC50 | 0           | 441.3       | 165.3            | 767.0     | 0.56  | 350.8     | 215.0     | 24.5        | 50.0       | 3%   | 5%        | 4%   | 5%  | 3%  | 3%  | 2%   | 4%   |
| HK-N  | AVG         | -----       | 260.9       | 106.3            | 1303.7    | 0.76  | 137.8     | 82.1      | 29.0        | 201.1      | 6%   | 29%       | 11%  | 6%  | 10% | 16% | 2%   | 8%   |
|       | Max depol.  | 14          | 295.4       | 109.3            | 751.0     | 0.60  | 155.7     | 107.2     | 29.9        | 167.2      | 6%   | 9%        | 36%  | 15% | 6%  | 22% | 1%   | 2%   |
|       | lowest IC50 | 14          | 295.4       | 109.3            | 751.0     | 0.60  | 155.7     | 107.2     | 29.9        | 167.2      | 6%   | 9%        | 36%  | 15% | 6%  | 22% | 1%   | 2%   |

Table 3. The correction factors needed for ABTS scavenging calculations at basic pH. These values were used by subtracting the absorbance from Figure S3 from the initial absorbance of the ABTS without any buffer.

| <b>Concentration</b> | <b>Absorbance Correction</b> |
|----------------------|------------------------------|
| Between 0-20 mg/L    | 0.000                        |
| 40 mg/L              | 0.054                        |
| 60 mg/L              | 0.115                        |
| 80 mg/L              | 0.141                        |
| 100 mg/L             | 0.223                        |
| 140 mg/L             | 0.278                        |
| 160 mg/L             | 0.310                        |
| Over 200 mg/L        | 0.405                        |



Table 4. FTIR assignments. The values in bold correspond to those that are highlighted in red in Figure 2 in the manuscript.

| MWL         | HO          | HK          | SK          | HaK         |                                                                              |
|-------------|-------------|-------------|-------------|-------------|------------------------------------------------------------------------------|
| 3507        | 3377        | 3294        | 3462        | 3416        | O-H stretching                                                               |
|             | 3086        | 3086        | 3005        | 3005        | C=H stretching                                                               |
| 2963        | 2963        | 2963        | 2943        | 2943        | C-H stretching<br>(CH <sub>2</sub> asymmetric vibration (guaiacyl-syringyl)) |
|             | 2938        | 2920        | 2872        |             | C-H stretching (methyl and methylene groups)                                 |
| 2885        | 2843        | 2851        | 2839        | 2839        | C-H stretching                                                               |
|             |             |             | 2045        |             |                                                                              |
| <b>1705</b> | <b>1707</b> | <b>1711</b> | <b>1721</b> | <b>1707</b> | <b>C=O stretching unconjugated</b>                                           |
| <b>1602</b> | <b>1628</b> | <b>1619</b> | <b>1629</b> | <b>1619</b> | <b>aromatic skeletal vibration + C=O stretching<br/>(conjugated)</b>         |
| <b>1509</b> | <b>1512</b> | <b>1508</b> | <b>1505</b> | <b>1506</b> | <b>aromatic skeletal vibration</b>                                           |
| 1459        | 1459        | 1458        | 1460        | 1462        | C-H deformation (methyl and methylene)                                       |
| 1422        | 1425        | 1425        | 1421        | 1422        | C-H in-plane deformation with aromatic ring<br>stretching                    |
| 1325        | 1330        | 1329        |             | 1323        | C-O of the syringyl ring                                                     |
| 1267        | 1266        | 1267        | 1269        | 1259        | C-O of the guaiacyl ring                                                     |
| <b>1217</b> | <b>1235</b> | <b>1231</b> | <b>1223</b> | <b>1233</b> | <b>C-C + C-O stretch<br/>(phenolic O-H plus ether C-O)</b>                   |
| 1163        | 1170        | 1165        | 1156        | 1163        | C-O stretching in aliphatic groups                                           |

|             |             |             |             |             |                                                                                                          |
|-------------|-------------|-------------|-------------|-------------|----------------------------------------------------------------------------------------------------------|
| 1135        | 1123        | 1124        | 1124        | 1122        | aromatic C-H in plane deformation of guaiacyl ring                                                       |
| <b>1074</b> | <b>1086</b> | <b>1091</b> | <b>1087</b> | <b>1087</b> | <b>C-O deformations at C<sub>β</sub> and aliphatic ethers</b>                                            |
| <b>1046</b> | <b>1033</b> | <b>1027</b> | <b>1032</b> | <b>1027</b> | <b>aromatic C-H in plane deformation (G&gt;S), C-O deformation at C<sub>α</sub> and aliphatic ethers</b> |
| 920         |             |             |             |             | =CH out-of-plane deformation in aromatic ring                                                            |
| 885         | 837         | 856         | 880         | 880         | C-H out of plane vibrations in 2,5,6 of guaiacyl units                                                   |

Table 5. The  $R^2$  values between various parameters and products in basic conditions. The higher the value and the darker the shade indicate stronger relationships.

|            | B-O-4 | S/G  | Sol. | C-Sol. | NTA conc | DLS size | PDI  | phenolics | flavonoids | zeta | IC50 |
|------------|-------|------|------|--------|----------|----------|------|-----------|------------|------|------|
| B-O-4      |       |      |      |        |          |          |      |           |            |      |      |
| S/G        | 0.00  |      |      |        |          |          |      |           |            |      |      |
| Sol.       | 0.59  | 0.13 |      |        |          |          |      |           |            |      |      |
| C-Sol.     | 0.82  | 0.00 | 0.80 |        |          |          |      |           |            |      |      |
| NTA conc   | 0.34  | 0.22 | 0.82 | 0.50   |          |          |      |           |            |      |      |
| DLS size   | 0.74  | 0.03 | 0.30 | 0.51   | 0.11     |          |      |           |            |      |      |
| PDI        | 0.89  | 0.01 | 0.68 | 0.75   | 0.52     | 0.22     |      |           |            |      |      |
| phenolics  | 0.83  | 0.15 | 0.72 | 0.68   | 0.53     | 0.27     | 0.62 |           |            |      |      |
| flavonoids | 0.46  | 0.27 | 0.31 | 0.16   | 0.27     | 0.01     | 0.25 | 0.61      |            |      |      |
| zeta       | 0.60  | 0.43 | 0.00 | 0.09   | 0.00     | 0.02     | 0.18 | 0.05      | 0.00       |      |      |
| IC50       | 0.38  | 0.31 | 0.67 | 0.56   | 0.49     | 0.26     | 0.37 | 0.53      | 0.18       | 0.00 |      |

Table 6 The  $R^2$  values between various parameters and products in neutral conditions. The higher the value and the darker the shade indicate stronger relationships.

|            | B-O-4 | S/G  | Sol. | C-Sol. | NTA conc | DLS size | PDI  | phenolics | flavonoids | zeta | IC50 |
|------------|-------|------|------|--------|----------|----------|------|-----------|------------|------|------|
| B-O-4      |       |      |      |        |          |          |      |           |            |      |      |
| S/G        | 0.00  |      |      |        |          |          |      |           |            |      |      |
| Sol.       | 0.65  | 0.03 |      |        |          |          |      |           |            |      |      |
| C-Sol.     | 0.78  | 0.04 | 0.88 |        |          |          |      |           |            |      |      |
| NTA conc   | 0.98  | 0.03 | 0.44 | 0.59   |          |          |      |           |            |      |      |
| DLS size   | 0.75  | 0.02 | 0.78 | 0.81   | 0.47     |          |      |           |            |      |      |
| PDI        | 0.92  | 0.06 | 0.45 | 0.45   | 0.49     | 0.59     |      |           |            |      |      |
| phenolics  | 0.97  | 0.01 | 0.62 | 0.74   | 0.58     | 0.75     | 0.69 |           |            |      |      |
| flavonoids | 0.96  | 0.01 | 0.62 | 0.70   | 0.45     | 0.64     | 0.71 | 0.78      |            |      |      |
| zeta       | 0.57  | 0.46 | 0.07 | 0.12   | 0.28     | 0.05     | 0.00 | 0.06      | 0.00       |      |      |
| IC50       | 0.59  | 0.03 | 0.75 | 0.77   | 0.35     | 0.87     | 0.55 | 0.66      | 0.69       | 0.01 |      |

## References

1. Zijlstra, D.S., et al., *Mild Organosolv Lignin Extraction with Alcohols: The Importance of Benzylic Alkoxylation*. ACS Sustainable Chemistry & Engineering, 2020. **8**(13): p. 5119-5131.
2. Mansfield, S.D., et al., *Whole plant cell wall characterization using solution-state 2D NMR*. Nat Protoc, 2012. **7**(9): p. 1579-89.
